# Supplementary material for: LRRK2 promotes the activation of NLRC4 inflammasome during Salmonella Typhimurium infection
Source: PubMed Central journal article supplement — J Exp Med. 2017 Oct 2;214(10):3051–66. doi: 10.1084/jem.20170014 (PMC5626397; doi:10.1084/jem.20170014), 2017-10-02
Supplement: JEM_20170014_sm.pdf [file JEM_20170014_sm.pdf]

SUPPLEMENTAL MATERIAL

Liu et al., <https://doi.org/10.1084/jem.20170014>

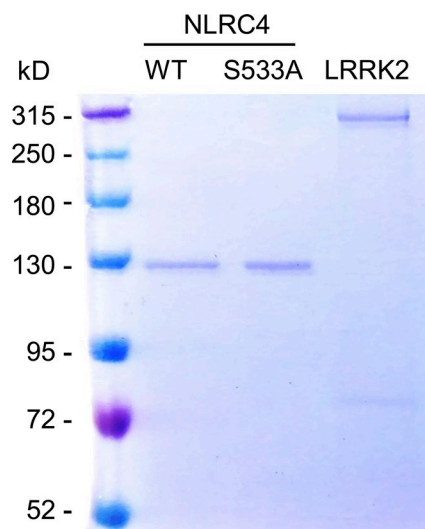

Figure S1. Coomassie blue staining of purified recombinant *LRRK2* and NLRC4 proteins (NLRC4 WT and S533A mutant).

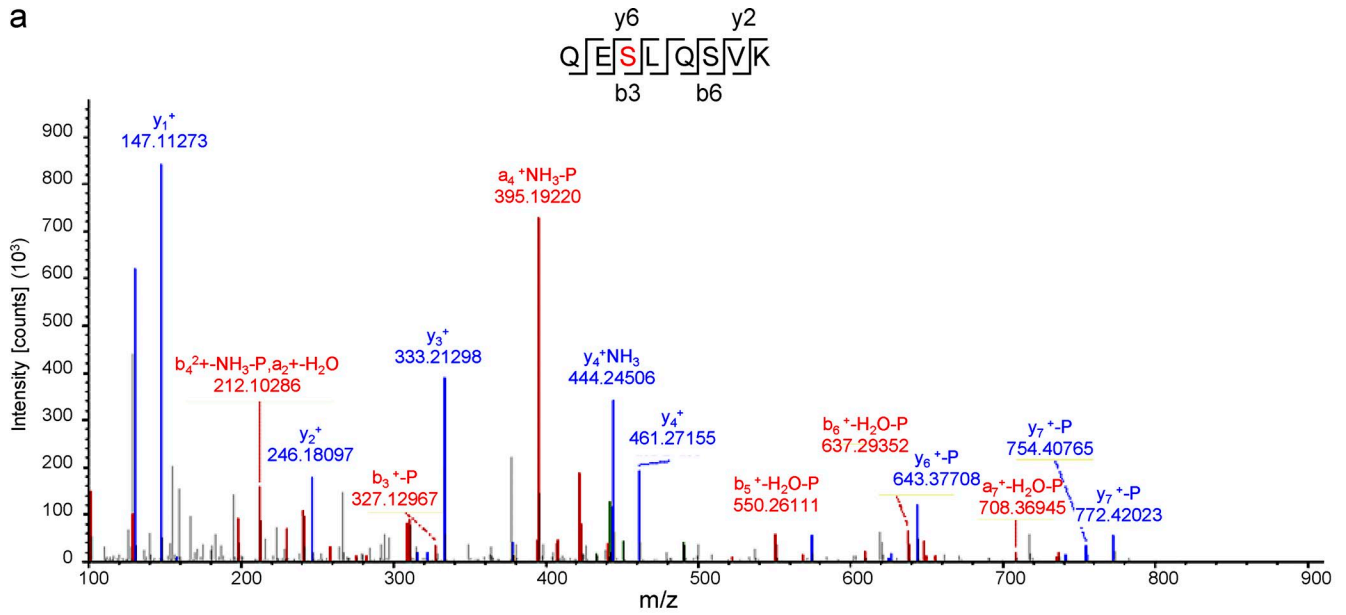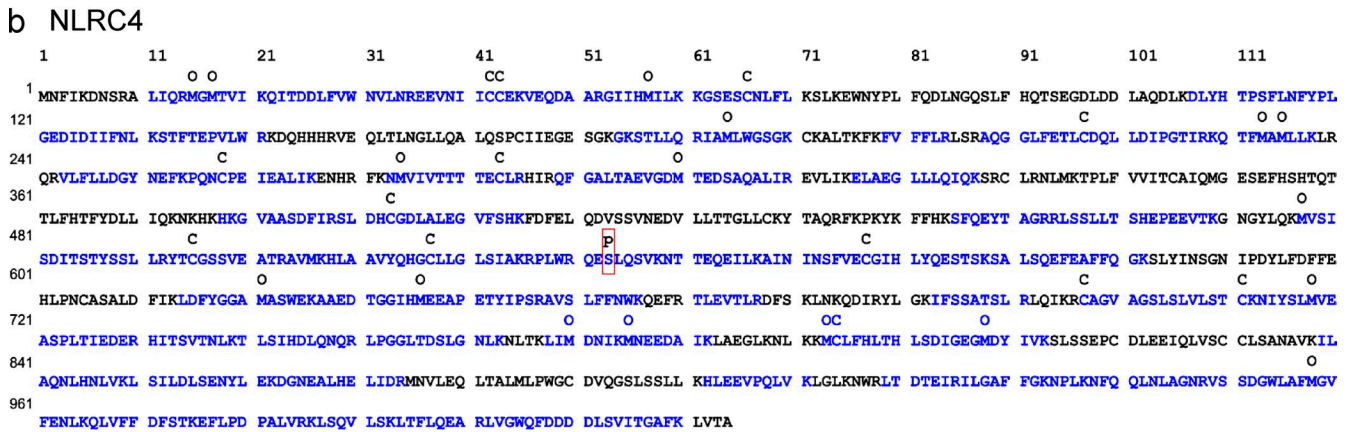

Figure S2. **Mass spectrometry identified phosphorylation at Ser533 of NLR4.** (a) Phosphorylation site analysis of NLR4. Immunoprecipitated NLR4 from HEK293T cells cotransfected with NLR4 and *LRK2* was used for mass spectrometric analysis following standard procedures. (b) Protein coverage of NLR4. NLR4 peptides detected by mass spectrometry covered 66.5% of the NLR4 protein sequence. Residues covered are highlighted in blue font. Phosphorylation was detected only on Ser533 (boxed in red) of NLR4.

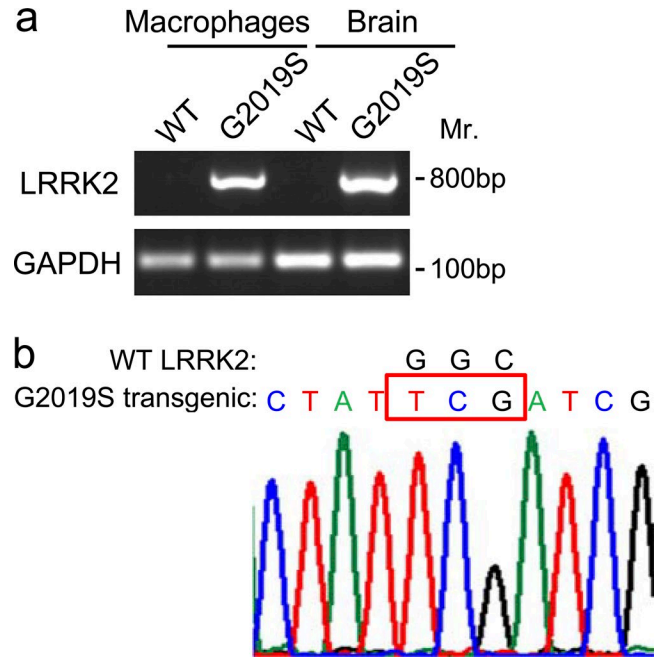

Figure S3. **Genotyping of *LRRK2* G2019S transgenic mice.** (a) RT-PCR to examine human *LRRK2* mRNA expression in *LRRK2* G2019S transgenic mice. RNA was extracted from peritoneal macrophages and brain tissue of G2019S transgenic mice, cDNA was synthesized, and human-specific primers to *LRRK2* were used for RT-PCR. Data are representative of two independent experiments.  $n = 3$  mice/group. Mr. represents the DNA marker used. (b) Sequence result of *LRRK2* cDNA<sub>5751-6540</sub> from peritoneal macrophages of G2019S transgenic mice. Three base pairs of the GGC (Gly) to TCG (Ser) transition (between 6,055–6,057 bp) were detected and are highlighted in the red box.
